# Supplementary material for: Electrochemical immunosensor detection of tumor markers based on a GO composite nanoprobe for signal amplification
Source: Royal Society of Chemistry journal article supplement (doi:10.1039/c7ay02932b), 2018-01-01
Supplement: c7ay02932b1.pdf [file c7ay02932b1.pdf]

# Electrochemical Immunosensor Detection of Tumor Markers based on GO Composite Nanoprobe for Signal Amplification

Jing Wang, Dongcheng Yang, Mifa Chen, Beifang Liu, Hou Chen\*, Hui Xu,

Wenxiang Wang, Liangjiu Bai\*

*Key Laboratory of High Performance and Functional Polymer in the Universities of Shandong Province, School of Chemistry and Materials Science, Ludong University, Yantai 264025, China.*

\*Corresponding author. E-mail: ldupolymchen@163.com (H. Chen); bailiangjiu@163.com (L. J. Bai)

## Supporting Information

**Table S1** Comparison of methods for the detection of AFP

| <b>Biomarker</b> | <b>Method</b>                         | <b>Detection range</b>                | <b>LOD</b>  | <b>Reference</b> |
|------------------|---------------------------------------|---------------------------------------|-------------|------------------|
| <b>AFP</b>       | Electrochemical Immunosensor          | 0.01 ng/mL-50 ng/mL                   | 3 pg/mL     | [S1]             |
| <b>AFP</b>       | Amperometric Enzyme<br>Immunosensor   | $5 \times 10^{-5}$ ng/mL-250<br>ng/mL | 1.1 fg/mL   | [S2]             |
| <b>AFP</b>       | Electrochemical Immunosensor          | 0.01 ng/mL-100 ng/mL                  | 4.6 pg/mL   | [S3]             |
| <b>AFP</b>       | Electrochemical Immunosensor          | 0.1 ng/mL-100 ng/mL                   | 30 pg/mL    | [S4]             |
| <b>AFP</b>       | Electrochemical Immunosensor          | 0.02 ng/mL-4.0 ng/mL                  | 10 ng/mL    | [S5]             |
| <b>AFP</b>       | Electrochemical Immunosensor          | 0.01 ng/mL-60 ng/mL                   | 1.6 pg/mL   | [S6]             |
| <b>AFP</b>       | Electrochemical Immunosensor          | 0.1 pg/mL-50 ng/mL                    | 0.033 pg/mL | [S7]             |
| <b>AFP</b>       | Electrochemical Bio Bar<br>Code Assay | 0.02 ng/mL-3.5 ng/mL                  | 9.6 pg/mL   | [S8]             |

|            |                              |                      |             |              |
|------------|------------------------------|----------------------|-------------|--------------|
| <b>AFP</b> | Electrochemical Immunosensor | 0-100 ng/mL          | 200 fg/mL   | [S9]         |
| <b>AFP</b> | Electrochemical Immunosensor | 0.106 pg/mL-35 ng/mL | 0.106 pg/mL | This artical |

- [S1] F. Yang, Y. Chai, R. Yuan, J. Han, Y. Yuan, N. Liao and Z. Yang, *Anal. Methods.*, 2013, **5**, 5279-5285.
- [S2] K. Liu, J. Zhang, Q. Liu and H. Huang, *Electrochim. Acta.*, 2013, **114**, 448-454.
- [S3] Q. Gao, N. Liu and Z. Ma, *Anal. Chim. Acta.*, 2014, **829**, 15-21.
- [S4] J. Guo, X. Han, J. Wang, J. Zhao, Z. Guo and Y. Zhang, *Anal. Biochem.*, 2015, **491**, 58-64.
- [S5] J. Tang, B. Su, D. Tang and G. Chen, *Biosens. Bioelectron.*, 2010, **25**, 2657-2662.
- [S6] Z. Yang, Y. Chai, R. Yuan, Y. Zhuo, Y. Li, J. Han and N. Liao, *Sensor. Actuat. B. Chem.*, 2014, **193**, 461-466.
- [S7] Y. Wei, Y. Li, N. Li, Y. Zhang, T. Yan, H. Ma and Q. Wei, *Biosens. Bioelectron.*, 2016, **79**, 482-487.
- [S8] C. Ding, Q. Zhang and S. Zhang, *Biosens. Bioelectron.*, 2009, **24**, 2434.
- [S9] L. Zhang, C. Li, D. Zhao, T. Wu and G. Nie, *Microchim. Acta.*, 2014, **181**, 1601-1608.
